# Supplementary material for: PMTED: a plant microRNA target expression database
Source: PubMed Central journal article supplement (PMC3680227; doi:10.1186/1471-2105-14-174), 2013-06-03
Supplement: 1471-2105-14-174-S1.pdf [file 1471-2105-14-174-S1.pdf]

**Additional file 1:**

| <b>Table S1. Experiment list.</b>                                                                        |                                                                                                                      |
|----------------------------------------------------------------------------------------------------------|----------------------------------------------------------------------------------------------------------------------|
| Stars(*) after geo_accession number means the corresponding experiments were selected for meta-analysis. |                                                                                                                      |
| <b>GEO_Accession</b>                                                                                     | <b>Title</b>                                                                                                         |
| <b>Arabidopsis thaliana</b>                                                                              |                                                                                                                      |
| GSE10019                                                                                                 | Identification of RGA downstream genes by using steroid-inducible system                                             |
| GSE10323                                                                                                 | Testing Arabidopsis for the presence of arbuscular mycorrhizal signalling pathways                                   |
| GSE10414                                                                                                 | microRNA156 resistant SQUAMOSA-PROMOTER-BINDING PROTEIN-LIKE13 (mSPL13)                                              |
| GSE10496                                                                                                 | Expression analysis of the effect of protoplasting and FACS sorting in roots exposed to iron deficiency (-Fe)        |
| GSE10497                                                                                                 | Expression analysis of root developmental zones after iron deficiency (-Fe) treatment                                |
| GSE10501                                                                                                 | Expression analysis of root cell-types after iron deficiency (-Fe) treatment                                         |
| GSE10502                                                                                                 | Time course expression analysis of the iron deficiency (-Fe) response in Arabidopsis roots                           |
| GSE10568                                                                                                 | camta3 mutant versus wild type microarray analysis                                                                   |
| GSE10643                                                                                                 | Transcription profiling of Arabidopsis dor mutant and wild-type plants in response to drought stress.                |
| GSE10646                                                                                                 | BTH treated mkk1, mkk2 and mkk1/2 knockout mutant                                                                    |
| GSE10670                                                                                                 | Global expression profiling of wild type and transgenic Arabidopsis plants in response to water stress               |
| GSE10719                                                                                                 | Response of Arabidopsis cell culture to phytoprostane A1                                                             |
| GSE10732                                                                                                 | Identification of TGA-regulated genes in response to phytoprostane A1 and OPDA                                       |
| GSE10749                                                                                                 | Response of Arabidopsis cell culture to cyclopentenone oxylipins                                                     |
| GSE10801                                                                                                 | C. fulvum Avr2                                                                                                       |
| GSE10812                                                                                                 | Expression data from thylakoidal ascorbate peroxidase overexpressor Arabidopsis thaliana (Col) rosette leaves        |
| GSE11119                                                                                                 | SOL2 mutation affect gene expression at root apex                                                                    |
| GSE11216*                                                                                                | Brassinazole treatment of arf2 and wild-type dark-grown seedlings                                                    |
| GSE11250                                                                                                 | Overexpression of miR396                                                                                             |
| GSE11505                                                                                                 | The Arabidopsis BRAHMA Chromatin Remodelling ATPase Is Involved in Direct Repression of Embryonic Traits in Leaves   |
| GSE11532                                                                                                 | Octopus transcriptome (affy_phloem_ath1)                                                                             |
| GSE11538                                                                                                 | The association between gene expression and whole genome histone H3K4 mono-, di, and trimethylation: expression data |
| GSE11758                                                                                                 | Plant response to misfolded protein in the cytosol                                                                   |
| GSE11807                                                                                                 | Flg22 regulates MAP kinase 6 interaction with an ethylene response factor substrate via ethylene                     |
| GSE11852                                                                                                 | Effect of uniconazole on wt and pkl mutant germinating seeds                                                         |
| GSE12029*                                                                                                | NFYA5, a CCAAT binding transcription factor important for drought resistance in Arabidopsis                          |
| GSE12401                                                                                                 | Transcript abundance data from seedlings of wild-type Ws and ged1 (greening after extended darkness 1) mutant        |
| GSE12402                                                                                                 | Expression data from Arabidopsis seed compartments at the pre-globular stage                                         |
| GSE12522                                                                                                 | Comparison of gene expression between wild type and gl3 egl3 trichomeless mutant green seedling tissues              |
| GSE12551                                                                                                 | Inducible expression of trichome regulators, GL1 and GL3                                                             |
| GSE12619*                                                                                                | Heat shock response of til1-1 mutant plants                                                                          |
| GSE12676                                                                                                 | Arabidopsis thaliana Ler developmental series                                                                        |
| GSE12715                                                                                                 | ABA and ethylene signaling crosstalk                                                                                 |
| GSE12856*                                                                                                | Penetration resistance: Wildtype and ataf1-1 mutant response to Bgh 12 h after inoculation, 2*2 factorial design     |

|           |                                                                                                                          |
|-----------|--------------------------------------------------------------------------------------------------------------------------|
| GSE12964* | Auxin stimulates brassinosteroid biosynthesis in Arabidopsis roots                                                       |
| GSE13596  | A gene expression map of Arabidopsis thaliana shoot apical meristem stem cell niche                                      |
| GSE13803  | Interaction between the light environment and the Arabidopsis wound response                                             |
| GSE13833* | Transcriptome changes triggered by the synthetic defense elicitors DCA and INA in Arabidopsis thaliana                   |
| GSE13881  | Transcriptional profiles between mp mutant seedlings and transgenics carrying the dexamethasone-inducible GR-bdl protein |
| GSE13913  | WT and php mutants                                                                                                       |
| GSE13929  | Arabidopsis thaliana three hours after infection with Agrobacterium tumefaciens                                          |
| GSE13930* | Arabidopsis thaliana six days after infection with Agrobacterium tumefaciens                                             |
| GSE14106  | Transcriptome data from inflorescence stalks of intact A. thaliana plants after infection with A. tumefaciens            |
| GSE14229  | The differentially expressed genes identified in the microarray analysis using myb5 and wild-type (Col) seeds            |
| GSE14247  | Interplay between ethylene, ETP1/ETP2 F-box proteins, and degradation of EIN2 triggers ethylene responses in Arabidopsis |
| GSE14374* | Expression data from Col-0 and pil5 imbibed seeds after far-red or far-red/red light irradiation.                        |
| GSE14420  | Global gene expression of Arabidopsis lines with altered ANAC102 expression under normal and low oxygen conditions       |
| GSE14493  | Immunopurified mRNA-ribosome complexes expose cell-type specific plasticity during hypoxia in Arabidopsis root tips      |
| GSE1491*  | Identification of Inhibitors of Auxin Transcriptional Activation via Chemical Genetics in Arabidopsis                    |
| GSE14961  | Expression data from Arabidopsis Seedlings treated with Salicylic Acid                                                   |
| GSE15160  | Expression data from Arabidopsis seed compartments at the heart stage.                                                   |
| GSE15165  | Expression data from Arabidopsis seed compartments at the mature green stage.                                            |
| GSE15189  | Early Iron Deficiency Induced Changes in Arabidopsis Roots                                                               |
| GSE15577  | Involvement of the Chromatin Modifier ATX1 and of the Arabidopsis Myotubularin Homolog (MYO1) in the Response to Drought |
| GSE15649  | Early phosphate-deficiency induced signal changes in Arabidopsis roots                                                   |
| GSE15680  | Laser microdissection of Arabidopsis cells at the powdery mildew infection site                                          |
| GSE15689* | A complementary role for ELF3 and TFL1 in the regulation of flowering time by ambient temperature.                       |
| GSE16061  | Transcriptome comparison of Col-0, se-1, ago1-27 and se-1 35S::MIR156 in Arabidopsis thaliana.                           |
| GSE16222  | Effects of heat, anoxia, and combined heat-anoxia treatments                                                             |
| GSE16472  | Identification of early flg22 responsive genes in Arabidopsis mesophyll cells                                            |
| GSE16497  | Arabidopsis thaliana gene expression changes upon treatment with green peach aphid saliva                                |
| GSE16557  | Gene expression changes underlying initial cellular and molecular responses to MAMPs in Arabidopsis mesophyll cells      |
| GSE16722  | Expression data from Arabidopsis thaliana under phosphate starvation stress                                              |
| GSE16765* | Transcriptomic and phenotypic variation for salt stress response in Arabidopsis                                          |
| GSE16964* | Iron-deficiency-induced changes in wild type, ubc13A and cucumber CsUBC13 overexpressed Arabidopsis roots                |
| GSE17193* | Transcript profile of chitosan-treated Arabidopsis seedlings                                                             |
| GSE17343  | Expression data from Arabidopsis pollen and semi in vivo- and in vitro-grown pollen tubes.                               |
| GSE17382* | Identification of early flg22 responsive genes in Arabidopsis seedlings                                                  |
| GSE17499* | Expression data from 2-week-old Arabidopsis untreated seedlings grown under a short day condition                        |
| GSE17610* | Gene expression in response to AGL15 during somatic embryogenesis                                                        |
| GSE17824  | Transcriptional profiling after inhibition of cellulose synthesis by TA and IXB in Arabidopsis thaliana suspension cells |

|           |                                                                                                                                                                                   |
|-----------|-----------------------------------------------------------------------------------------------------------------------------------------------------------------------------------|
| GSE17845* | Transcriptional profiling of leaf blades and petioles subjected to shade avoidance syndrome                                                                                       |
| GSE18071* | Chloroplast polynucleotide phosphorylase null mutant (pnp1-1) and phosphate starvation                                                                                            |
| GSE18153* | Effect of deuterium oxide on Arabidopsis gene expression                                                                                                                          |
| GSE18217  | Global gene expression analysis of transgenic, mannitol-producing, and salt-tolerant Arabidopsis thaliana indicates widespread changes in abiotic and biotic stress-related genes |
| GSE18311* | Comparison of gene expression in wild type and angustifoila3 leaf primordia                                                                                                       |
| GSE18329* | Transcriptome changes triggered by Hyaloperonospora parasitica arabidopsis Noco2 in WT and wrky72 mutants at 96 hpt                                                               |
| GSE18417  | Arabidopsis transcriptome changes caused by ectopic production of a turtle riboflavin-binding protein                                                                             |
| GSE18624  | H2A.Z - Containing Nucleosomes Mediate the Thermosensory Response in Arabidopsis                                                                                                  |
| GSE18666  | Persistent heat stress in Arabidopsis                                                                                                                                             |
| GSE18928* | Expression data from 5-week-old Arabidopsis                                                                                                                                       |
| GSE18960  | Gene expression changes in Arabidopsis thaliana treated with Myzus persicae saliva                                                                                                |
| GSE18980  | Transcriptome of Arabidopsis APS kinase null mutants                                                                                                                              |
| GSE18981* | Analysis of RLI on RNA stability in A. thaliana                                                                                                                                   |
| GSE18982  | Molecular responses to external pH changes in roots of Arabidopsis thaliana                                                                                                       |
| GSE18984  | Treatment of Arabidopsis with low concentration of nitrate                                                                                                                        |
| GSE18986  | Transcriptome of the exo70A1 mutant                                                                                                                                               |
| GSE18987  | Transcriptome analysis during axillary shoot outgrowth                                                                                                                            |
| GSE19241  | A novel S-sulfocysteine synthase essential for chloroplast function in Arabidopsis thaliana                                                                                       |
| GSE19242* | Mitochondrial beta-cyanoalanine synthase is essential for root hair formation in Arabidopsis thaliana                                                                             |
| GSE19273  | Biological function of Pip3                                                                                                                                                       |
| GSE19700  | Time of day shapes the Arabidopsis drought transcriptomes                                                                                                                         |
| GSE19978  | Different gene expressions in root tips between CLE10 and CLE25 treatment                                                                                                         |
| GSE20044  | High resolution NO3 response of Arabidopsis Roots                                                                                                                                 |
| GSE20188  | Expression data in response to neonicotinoid insecticides                                                                                                                         |
| GSE20221  | Cellulose synthase mutants                                                                                                                                                        |
| GSE20222  | Cesium Toxicity in Arabidopsis                                                                                                                                                    |
| GSE20223  | Gibberellin (GA) Treatment of Arabidopsis Root Tips                                                                                                                               |
| GSE20226* | Arabidopsis thaliana/Phytophthora parasitica compatible interaction transcriptome                                                                                                 |
| GSE2133   | Effects of anoxia and sucrose on seedling growth                                                                                                                                  |
| GSE2406   | WTv.AOXantisense                                                                                                                                                                  |
| GSE3350   | SLR/IAA14-dependent auxin induced lateral root initiation                                                                                                                         |
| GSE3416*  | Diurnal gene expression in Arabidopsis thaliana Col-0 rosette leaves                                                                                                              |
| GSE3423*  | Carbon fixation (endogenous sugar) and light-dependent gene expression                                                                                                            |
| GSE4847   | Expression data from tocopherol deficient seedlings of Arabidopsis                                                                                                                |
| GSE5526   | Transcriptional Programs of Early Reproductive Stages in Arabidopsis                                                                                                              |
| GSE5529   | Arabidopsis E2F target genes                                                                                                                                                      |
| GSE5530*  | Hydrogen peroxide stress and Zat12 over-expression in Arabidopsis.                                                                                                                |
| GSE5534   | Response to cold, plate grown plants                                                                                                                                              |
| GSE5535   | Response to cold, soil grown plants                                                                                                                                               |
| GSE5539   | Over-expression of MBF1c enhances stress tolerance                                                                                                                                |
| GSE5611*  | Differential gene expression patterns in the phosphate deficient mutant, pho 1                                                                                                    |
| GSE5614   | Changes in Gene Expression in Brassica oleracea Shoots during Phosphate Starvation (Cross-species study)                                                                          |
| GSE5616*  | AtGenExpress: Response to Phytophthora infestans                                                                                                                                  |

|          |                                                                                                                        |
|----------|------------------------------------------------------------------------------------------------------------------------|
| GSE5621  | AtGenExpress: Stress Treatments (Cold stress)                                                                          |
| GSE5622  | AtGenExpress: Stress Treatments (Osmotic stress)                                                                       |
| GSE5623  | AtGenExpress: Stress Treatments (Salt stress)                                                                          |
| GSE5625  | AtGenExpress: Stress Treatments (Genotoxic stress)                                                                     |
| GSE5629  | AtGenExpress: Developmental series (seedlings and whole plants)                                                        |
| GSE5631  | AtGenExpress: Developmental series (roots)                                                                             |
| GSE5634  | AtGenExpress: Developmental series (siliques and seeds)                                                                |
| GSE5687  | AtGenExpress: Different temperature treatment of seeds                                                                 |
| GSE5688  | AtGenExpress: Response to sulfate limitation                                                                           |
| GSE5696  | AtGenExpress: Effect of brassinosteroids in seedlings                                                                  |
| GSE5697  | AtGenExpress: Comparison of plant hormone-related mutants                                                              |
| GSE5701  | AtGenExpress: Basic hormone treatment of seeds                                                                         |
| GSE5712* | Transcriptome analysis of ARRESTED DEVELOPMENT 3 mutant.                                                               |
| GSE5722* | Functional Genomics of Ozone Stress in Arabidopsis.                                                                    |
| GSE5729  | Role of COV in vascular patterning                                                                                     |
| GSE5736  | To identify changes in gene expression during silique senescence in Arabidopsis thaliana                               |
| GSE5740  | Polycomb Binding Protein                                                                                               |
| GSE5745  | Mutant array                                                                                                           |
| GSE5751  | The early post-germinative embryo and endosperm transcriptomes in Arabidopsis                                          |
| GSE5759  | red illumination w/o lincomycin                                                                                        |
| GSE6151  | The mechanisms involved in the interplay between dormancy and secondary growth in Arabidopsis                          |
| GSE6160  | Differential gene expression patterns in potassium-starved and caesium-treated plants                                  |
| GSE6165* | The effect of mutations in AtrbohC on the pattern of gene expression in primary root tissue.                           |
| GSE6179  | An investigation into transcriptional changes in developing Arabidopsis leaf caused by novel signalling protein, SPH1. |
| GSE6181  | Assembly of the cell wall pectic matrix.                                                                               |
| GSE629*  | Auxin-mediated gene expression in WT, iaa17, axr3 and iaa5iaa6iaa19 mutants                                            |
| GSE631   | Auxin mediated gene expression in WT and arf2-6 mutant                                                                 |
| GSE6516  | Silverleaf whitefly 2nd instar feeding on 7-week old Arabidopsis thaliana rosette leaves                               |
| GSE6696  | Transcriptome analyses show changes in gene expression to accompany pollen germination and tube growth in Arabidopsis  |
| GSE6831  | Systemic response to avirulent bacterial infection                                                                     |
| GSE6832  | Cytokinin treatment on aerial parts of seedlings                                                                       |
| GSE6954  | Identification of AGL24 downstream genes by using XVE inducible system                                                 |
| GSE7112  | Abscisic acid effect on wild type and the abh1 mutant                                                                  |
| GSE7227  | microRNA160 resistant AUXIN RESPONSE FACTOR10 (mARF10) germinating seeds                                               |
| GSE7334  | Microarray Analysis of Arabidopsis Genome Response to Aluminum Stress                                                  |
| GSE7353* | Early GA response genes in Arabidopsis thaliana                                                                        |
| GSE7432* | Ethylene and auxin interactions in the roots of Arabidopsis seedlings                                                  |
| GSE7636  | Expression analysis of the effect of protoplasting and FACS sorting in roots                                           |
| GSE7639  | Expression analysis of root developmental zones after treatment with salt                                              |
| GSE7641  | Expression analysis of root cell-types after treatment with salt                                                       |
| GSE7642* | Time course expression analysis of the salt stress response in Arabidopsis roots                                       |
| GSE8279  | Transgenerational Stability of the Arabidopsis Epigenome Is Coordinated by CG Methylation                              |
| GSE8739  | Early gibberellin responses in Arabidopsis                                                                             |

|                        |                                                                                                                                                                                 |
|------------------------|---------------------------------------------------------------------------------------------------------------------------------------------------------------------------------|
| GSE8912*               | Global expression profiling to study the effect of sulfometuron methyl herbicide treatment on <i>Arabidopsis thaliana</i>                                                       |
| GSE8913*               | Global expression profiling to study the effect of primisulfuron herbicide treatment on <i>Arabidopsis thaliana</i>                                                             |
| GSE8925*               | Global expression profiling to study the effect of imidazolinone herbicide treatment on <i>Arabidopsis thaliana</i>                                                             |
| GSE8926*               | Global expression profiling to study the effect of triazolopyrimidine herbicide treatment on <i>Arabidopsis thaliana</i>                                                        |
| GSE8927                | Global expression profiling to study the effect of glyphosate herbicide treatment on <i>Arabidopsis thaliana</i>                                                                |
| GSE8951*               | A light-independent allele of phytochrome B faithfully recapitulates photomorphogenic transcriptional networks                                                                  |
| GSE9148*               | Expression data of 10-day-old wild-type and chl1-5 plants exposed to 25 mM nitrate for 0h or 0.5h                                                                               |
| GSE9311                | Gene expression in roots and shoots of plants grown on selenate                                                                                                                 |
| GSE9605                | Target genes of AGAMOUS during early flower development in <i>Arabidopsis</i>                                                                                                   |
| GSE9728                | COP9 signalosome (csn) mutant analysis                                                                                                                                          |
| <b>Citrus sinensis</b> |                                                                                                                                                                                 |
| GSE10798*              | Transcriptional analysis of the sweet orange interaction with the citrus canker pathogens                                                                                       |
| GSE29633               | Expression data of sweet orange in response to <i>Candidatus Liberibacter asiaticus</i> infection at advanced stage                                                             |
| GSE30502*              | Transcriptional response of susceptible and tolerant citrus to infection with <i>Candidatus Liberibacter asiaticus</i>                                                          |
| <b>Glycine max</b>     |                                                                                                                                                                                 |
| GSE10251               | Gene expression profiling implicates novel hormonal regulation of the floral initiation process in soybeans                                                                     |
| GSE10284               | Detection and Validation of Single Feature Polymorphisms in Cowpea using a Soybean Genome Array                                                                                 |
| GSE10730               | Analysis of Iron Deficiency in Soybean Leaf Tissue                                                                                                                              |
| GSE12286               | Genomic Expression Profiling of Mature Soybean ( <i>Glycine max</i> ) Pollen                                                                                                    |
| GSE12300               | Suppression of oleosin in soybean cotyledon                                                                                                                                     |
| GSE12314               | Storage Protein Suppression in Transgenic Soybean Cotyledons                                                                                                                    |
| GSE17883               | Global transcriptome profiling of wild soybean ( <i>Glycine soja</i> ) roots under NaHCO <sub>3</sub> treatment                                                                 |
| GSE18822               | Transcript profiling of common bean using the Soybean Genome Array: optimizing analysis by masking biased probes                                                                |
| GSE20323*              | Alkaline-stress response in <i>Glycine soja</i> leaf identifies specific transcription factors and ABA-mediated signaling factors                                               |
| GSE20972               | Alterations in soybean gene expression profile after foliar application of lipo-chitooligosaccharide (LCO) from <i>Bradyrhizobium japonicum</i> under sub-optimal temperature   |
| GSE22158               | Expression of the Stress-Related Genes for Glutathione S-Transferase and Ascorbate Peroxidase in the Most-Glycinin-Deficient Soybean Cultivar Tousan205 during Seed Maturation. |
| GSE22978               | Microarray Analysis of <i>Phytophthora sojae</i> Gene Expression During Early Infection                                                                                         |
| GSE26198*              | Comparative physiology and transcriptional networks underlying the heat shock response in <i>Populus trichocarpa</i> , <i>Arabidopsis thaliana</i> and <i>Glycine max</i> [Soy] |
| GSE26208               | Expression data from the seed coats of black (iRT) and brown (irT) soybean variant for alleles of the R locus                                                                   |
| GSE26443               | Characterization of gene expression profile in developing soybean seeds by DNA microarray                                                                                       |
| GSE27894               | Expression data of Soybean root apical meristem and leaf                                                                                                                        |
| GSE29653               | GmMPK4 is a negative regulator of SA-mediated defense response                                                                                                                  |
| GSE7108                | Gene expression analysis in soybean with respect to <i>Pahakopsora pachyrhizii</i> at V2 growth stage                                                                           |
| GSE7511                | Expression data from soybean seed compartments with embryos at the heart stage                                                                                                  |
| GSE7592                | Expression data from SRB embryo regions at the globular stage                                                                                                                   |

|                            |                                                                                                                          |
|----------------------------|--------------------------------------------------------------------------------------------------------------------------|
| GSE7881                    | Expression data from soybean seed compartments with embryos at the cotyledon stage                                       |
| GSE9374                    | Exploration of microarrays as tools to assess substantial equivalence of genetically modified soybeans                   |
| GSE9730*                   | Effect of foliar spray of lipo-chitooligosaccharide (Nod factor) on soybean leaf gene expression.                        |
| <b>Gossypium hirsutum</b>  |                                                                                                                          |
| GSE16467                   | Global gene expression analysis of waterlogging stressed Cotton root and leaf tissue                                     |
| GSE26522*                  | Transcription profiling of One month old Gossypium herbaceum plant leaf during drought and watered condition             |
| <b>Medicago truncatula</b> |                                                                                                                          |
| GSE13602*                  | Transcriptome Profiles of Medicago Stem Internodes                                                                       |
| GSE13921                   | Medicago truncatula germinated seedlings grown in Petri dishes for 3 days then carry out salt stress                     |
| GSE17253*                  | affy-agro-bi-medicago-AGRO-BI-Toulouse                                                                                   |
| GSE18318                   | affy_root-dvt-nitrogen_medicago: Genetic determinism of root development in Medicago truncatula                          |
| GSE20587*                  | Comparison of plant responses upon Aphanomyces euteiches infection in wild type (A17) and NFP allelic mutants            |
| GSE22835                   | Characterization of a Medicago truncatula P450 monooxygenase mutant                                                      |
| GSE23721                   | Expression data from Sinorhizobium meliloti strains Rm8530 and Rm8530 mucR.                                              |
| GSE25034                   | Molecular analysis of heterosis in alfalfa                                                                               |
| GSE8115                    | A transcript profile of Medicago truncatula root meristem cells                                                          |
| GSE8131*                   | A transcript profile of Medicago truncatula 2HA and Jemmalong during somatic embryogenesis                               |
| GSE8138                    | A transcript profile of Medicago truncatula 2HA tissue culture with auxin treatment                                      |
| <b>Oryza sativa</b>        |                                                                                                                          |
| GSE10054                   | Expression information of splicing factor OsSKIPa knock-down and overexpressed rice                                      |
| GSE10857                   | Gene expression of rice root tips before, at and buckled by a hard layer in two rice varieties                           |
| GSE11025*                  | Comparative transcriptional profiling of two contrasting rice genotypes in response to rice stripe virus infection       |
| GSE11175*                  | Comparison of transcriptome profile between wild-type and dst mutant plants                                              |
| GSE11966                   | Expression data from rice embryo, endosperm, root, leaf and seedling                                                     |
| GSE12069                   | Microarray analyses reveal that plant mutagenesis may induce more transcriptomic changes than transgene insertion        |
| GSE13735*                  | Expression data from rice genotypes FL478 and IR29                                                                       |
| GSE14275*                  | Expression data for heat shock in rice seedlings                                                                         |
| GSE14298                   | Rice expression atlas (2): Pollination - Fertilization                                                                   |
| GSE14300                   | Rice expression atlas (4): Vegetative tissues                                                                            |
| GSE14403*                  | Root-specific transcriptional profiling of contrasting rice genotypes in response to salinity stress                     |
| GSE14692*                  | Temporal regulatory role of miR156 during leaf development                                                               |
| GSE15046                   | Transcriptome analysis of gibberellin-signaling mutants in rice [Oryza sativa]                                           |
| GSE15448*                  | Glycinebetaine-induced water-stress tolerance in codA-expressing transgenic indica rice                                  |
| GSE15912                   | Whole genome transcriptome profiling of Pusa 1266 and Pusa Basmati 1 in panicle primordia stage                          |
| GSE16108                   | Transcription profiling of parental lines and bulked salt sensitive and salt tolerant RILs derived from 2 rice varieties |
| GSE16265                   | SNEP: Simultaneous detection of nucleotide and expression polymorphisms using Affymetrix GeneChip                        |
| GSE17169                   | bulk RILs with high and low grain number per panicle derived from 2 cultivars at panicle primordia stage                 |
| GSE17194                   | Genome-wide gene expression profiling of rice Indica cultivar Zhongxian 3037 and mutant phoenix (pho) panicle            |
| GSE17245                   | Transcriptome analysis of iron and phosphorus interaction in rice seedlings                                              |

|                              |                                                                                                                                 |
|------------------------------|---------------------------------------------------------------------------------------------------------------------------------|
| GSE18361*                    | Temporal gene expression analysis from rice root (cv. Nipponbare) infected with Magnaporthe oryzae strain Guy11                 |
| GSE18930*                    | Microarray data from aerial tissue of submergence tolerant M202(Sub1) and intolerant M202                                       |
| GSE19239                     | Transgenic rice line carrying the maize resistance gene Rxo1 to Xanthomonas oryzae pv. oryzicola                                |
| GSE19844*                    | affy_xoo_rice-Transcriptomics-based identification of Xoo strain BAI3 Talc targets in rice                                      |
| GSE20522                     | Genome-wide gene expression of rice cultivar Gui-630 (Indica) X Taiwanjing (Japonica) and mutant lemmata (lem) panicle          |
| GSE24048*                    | Expression data from field droughted rice plants                                                                                |
| GSE24228                     | Identification of Rhizome-Specific Genes by Genome-wide Differential Expression Analysis in Oryza longistaminata                |
| GSE25073                     | Expression data from rice seedlings of wild type and the CHR729 mutant                                                          |
| GSE27726                     | Analysis of anther transcriptomes to identify genes contributing to meiosis and male gametophyte development in rice            |
| GSE27988                     | genome-wide gene expression profiling of rice pollen in different development stages                                            |
| GSE30818                     | Transcript profiling of crown rootless1 mutant stem base reveals new elements associated with crown root development in rice    |
| GSE31834                     | Expression data from shoot bases of rice seedling after gravistimulation                                                        |
| GSE4471*                     | Expression data from rice varieties Azucena and Bala grown in 0 and 1ppm arsenate                                               |
| GSE5167*                     | Rice seedling hormone treatment                                                                                                 |
| GSE6719                      | Cytokinin responsive genes in rice                                                                                              |
| GSE6720                      | Gene expression in OsRR6-overexpression line                                                                                    |
| GSE6901*                     | Expression data for stress treatment in rice seedlings                                                                          |
| GSE6908*                     | Transcript Profiling of the Aerobic and Anoxic Rice Coleoptile                                                                  |
| GSE7197                      | Down-regulation of OsSRT1 induces DNA fragmentation and cell death in rice                                                      |
| GSE7256                      | Identification of rice genes differentially expressed upon virulent infection by Magnaporthe grisea                             |
| GSE8216                      | Transcriptional profiling of Cellulase induced hypersensitive reaction like response in rice                                    |
| GSE8380                      | Rice Gene Network Inferred from Expression Profiling of Plants Overexpressing OsWRKY13                                          |
| GSE9498                      | Global gene expression profiles of Oryza sativa wild type Zhonghua11 and mutant gif1 in filling stage                           |
| <b>Populus trichocarpa</b>   |                                                                                                                                 |
| GSE17804                     | Habituation to thaxtomin A provides enhanced and durable resistance to inhibitors of cellulose synthesis                        |
| GSE21480                     | Novel aspects of transcriptional regulation in the winter survival and maintenance mechanism of perennial woody plants, poplar. |
| <b>Saccharum officinarum</b> |                                                                                                                                 |
| GSE11934                     | Differential expression of genes in the leaves of sugarcane in response to sugar accumulation                                   |
| GSE5021                      | Transcripts associated with cell wall metabolism and development in the sugarcane stem by GeneChip expression profiling         |
| <b>Solanum lycopersicum</b>  |                                                                                                                                 |
| GSE14358*                    | Gene regulation in parthenocarpic tomato fruit                                                                                  |
| GSE14637                     | Expression data of tomato fruit responses to Botrytis cinerea                                                                   |
| GSE16401*                    | tomato salt response                                                                                                            |
| GSE19787                     | Expression data from PSARK::IPT Nicotiana and wildtype plants                                                                   |
| GSE19792                     | Transcript profiling of tomato mutants producing anthocyanins in the fruit                                                      |
| GSE21020                     | Tomato root transcriptome response to a nitrogen-enriched soil patch                                                            |
| GSE21999*                    | Tomato fruit wound inoculation by C. coccodes and ammonium treated                                                              |
| GSE22304                     | Expression data in response to abiotic stresses in tomato at flowering stage                                                    |
| GSE23626                     | Genome wide expression analysis of psaA and psbA tobacco mutant plants.                                                         |

| <b>Triticum aestivum</b> |                                                                                                                                      |
|--------------------------|--------------------------------------------------------------------------------------------------------------------------------------|
| GSE12936*                | Transcriptomic analysis of the effect of silicon on wheat plants infected or uninfected with powdery mildew                          |
| GSE13660*                | Gene expression analysis of the wheat response to infection by <i>Fusarium pseudograminearum</i>                                     |
| GSE15864                 | Metabolism-based resistance to herbicides in black-grass                                                                             |
| GSE16457                 | affy_seed_kinetic_wheat-Transcriptomic wheat seed                                                                                    |
| GSE21386                 | RNA profiling of <i>Fusarium</i> head blight-resistant wheat addition lines containing the <i>Thinopyrum elongatum</i> chromosome 7E |
| GSE22080*                | Pleiotropic expression of endogenous genes upon fungus infection of wheat plants containing anti-fungal transgenes                   |
| GSE27320                 | Expression data in wheat ( <i>T. aestivum</i> L.) near isogenic lines in response to powdery mildew infection                        |
| GSE31760*                | Transcription profiling wheat responses to adapted and non-adapted isolates of the blast fungus, <i>Magnaporthe</i>                  |
| GSE31761                 | Transcription profiling of wheat interacting with incompatible and compatible yellow rust in a Yr1-containing genotype               |
| GSE31762                 | Wild emmer wheat comparison of drought resistant vs. susceptible genotypes under terminal drought                                    |
| GSE4929                  | wheat expression level polymorphism study parental genotypes 2 biological reps                                                       |
| GSE5937                  | Wheat expression level polymorphism study parental genotypes 2 biological reps from SB location                                      |
| GSE6027                  | Microarray expression analysis of meiosis and microsporogenesis in hexaploid bread wheat                                             |
| GSE9767                  | Genotypic differences in water soluble carbohydrate metabolism in stem                                                               |
| <b>Vitis vinifera</b>    |                                                                                                                                      |
| GSE11857                 | Gene expression patterns associated with grapevine resistance to downy mildew mediated by the Rpv1 and Rpv2 genes                    |
| GSE27180                 | Expression data from micropropagated <i>Vitis vinifera</i> when transferred to ex vitro conditions                                   |
| GSE31662                 | Grape skin transcriptome in the berries cultured in vitro treated with exogenous abscisic acid                                       |
| GSE31664                 | Grape skin transcriptome in the berries grown on the vine treated with exogenous abscisic acid                                       |
| <b>Zea mays</b>          |                                                                                                                                      |
| GSE10023*                | Maize gene expression during infection with <i>Ustilago maydis</i>                                                                   |
| GSE10236*                | Similar patterns of additive and non-additive gene expression in maize hybrids with varying levels of heterosis                      |
| GSE10237                 | Gene expression variation among eight maize inbreds                                                                                  |
| GSE10243                 | Profiling expression changes caused by a segmental aneuploid in maize                                                                |
| GSE11531                 | Downregulation of cinnamoyl-coenzyme A reductase in maize (affy_ccr_maize)                                                           |
| GSE12892                 | Maize gene expression during infection with <i>Ustilago maydis</i> strain SG200Dpep1                                                 |
| GSE15048*                | Gibberellin-induced gene expression in maize mesocotyl under deep-sowing condition                                                   |
| GSE15371                 | Auxin-induced gene expression in mesocotyl elongation of maize inbred line 3681-4 tolerant to deep-sowing                            |
| GSE16567*                | Genome-wide transcriptome analysis of two maize inbred lines under drought stress during the seedling stage                          |
| GSE18491*                | Expression data from maize endosperm                                                                                                 |
| GSE18846                 | affy_tj_maize-Understanding the Diversity of Maize Cell Wall                                                                         |
| GSE19212                 | Profiling expression changes caused by a segmental aneuploid in maize meristem tissues                                               |
| GSE19501*                | Maize gene expression during infection with <i>Fusarium moniliforme</i>                                                              |
| GSE19559*                | Maize gene expression during infection with <i>Ustilago maydis</i> strain SG200 <sub>紫咯</sub> ox1                                    |
| GSE21070*                | Expression profile of contrasting maize genotypes grown on acid and control soil (root tips)                                         |
| GSE22479*                | Expression profile of contrasting maize genotypes grown in acid and control soil (leaves)                                            |
| GSE22948                 | affy_diversity_maize-Understanding the Diversity of Maize Cell Wall                                                                  |
| GSE22950                 | affy_ams_maize-Cell wall maize mutant during arbuscular mycorrhizal symbiosis                                                        |

|           |                                                                                                                   |
|-----------|-------------------------------------------------------------------------------------------------------------------|
| GSE24624  | Understanding the Diversity of Maize Cell Wall (affy_cellwall_maize)                                              |
| GSE27626  | Responses of Zea mays root tissue to inoculation with the necrotrophic root pathogen Phytophthora cinnamomi       |
| GSE28479  | Maize gene expression during infection with Ustilago maydis strains SG200Dpit1 and SG200Dpit2                     |
| GSE29747* | Sporisorium reilianum Infection Changes Inflorescence and Branching Architectures of Maize                        |
| GSE31188  | Maize gene expression during infection with Colletotrichum graminicola                                            |
| GSE7030   | Phenotypic and molecular characterisation of a novel Bt2 allele in maize                                          |
| GSE8174   | Cis-transcriptional variation in maize inbred lines B73 and Mo17 leads to additive expression - Seedling data     |
| GSE8176*  | Cis-transcriptional variation in maize inbred lines B73 and Mo17 leads to additive expression - Immature ear data |
| GSE8179*  | Cis-transcriptional variation in maize inbred lines B73 and Mo17 leads to additive expression - Embryo data       |
| GSE8188   | Expression profiling of zmet2-m1 mutants relative to wild-type                                                    |
| GSE8194*  | Cis-transcriptional variation in maize inbred lines B73 and Mo17 leads to additive expression                     |
| GSE8275*  | Non-additive and imprinted gene expression in hybrid maize endosperm_13DAP                                        |
| GSE8278*  | Non-additive and imprinted gene expression in hybrid maize endosperm_19DAP                                        |
