# Supplementary material for: PMTED: a plant microRNA target expression database
Source: PubMed Central journal article supplement (PMC3680227; doi:10.1186/1471-2105-14-174), 2013-06-03
Supplement: 1471-2105-14-174-S2.pdf [file 1471-2105-14-174-S2.pdf]

## Additional file 2:

A

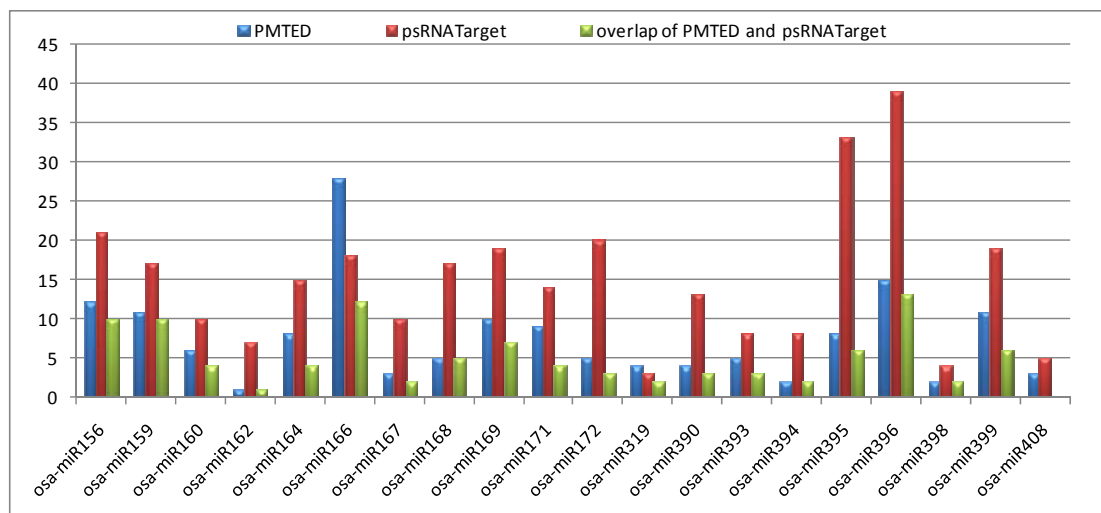

B

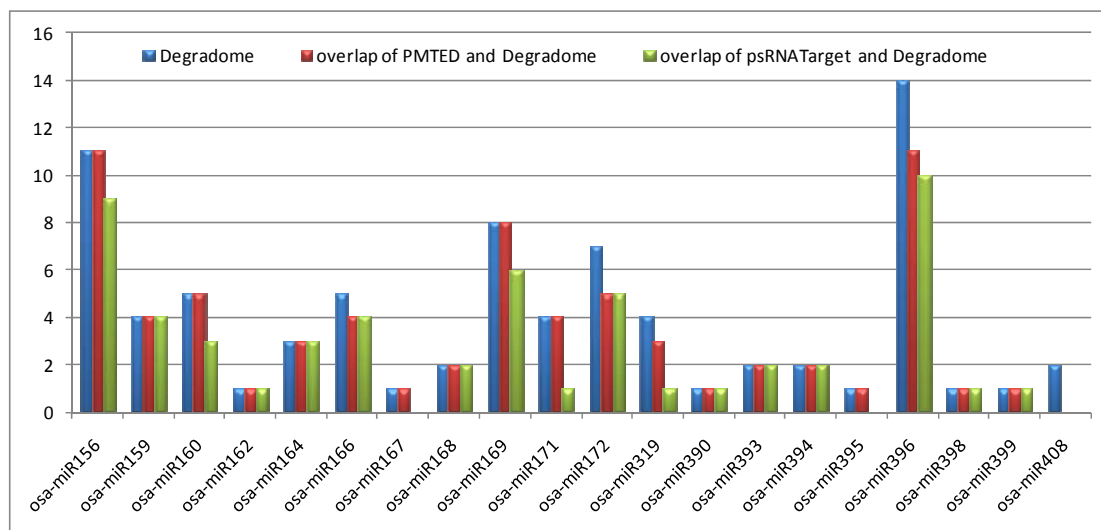

Figure S1: Comparison of target prediction results. A, Numbers of targets predicted by PMTED and psRNATarget. B, Numbers of targets validated by degradome data when compared with those predicted by PMTED or psRNATarget.
